# Supplementary material for: A multi-method approach for assessing the distribution of a rare, burrowing North American crayfish species
Source: PeerJ journal article supplement (doi:10.7717/peerj.14748), 2023-02-20

HUC 8 Watersheds

**Precision**

- Exact
- Good
- Fair
- Poor

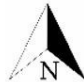

0 25 50 100 Kilometers

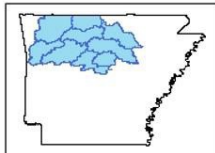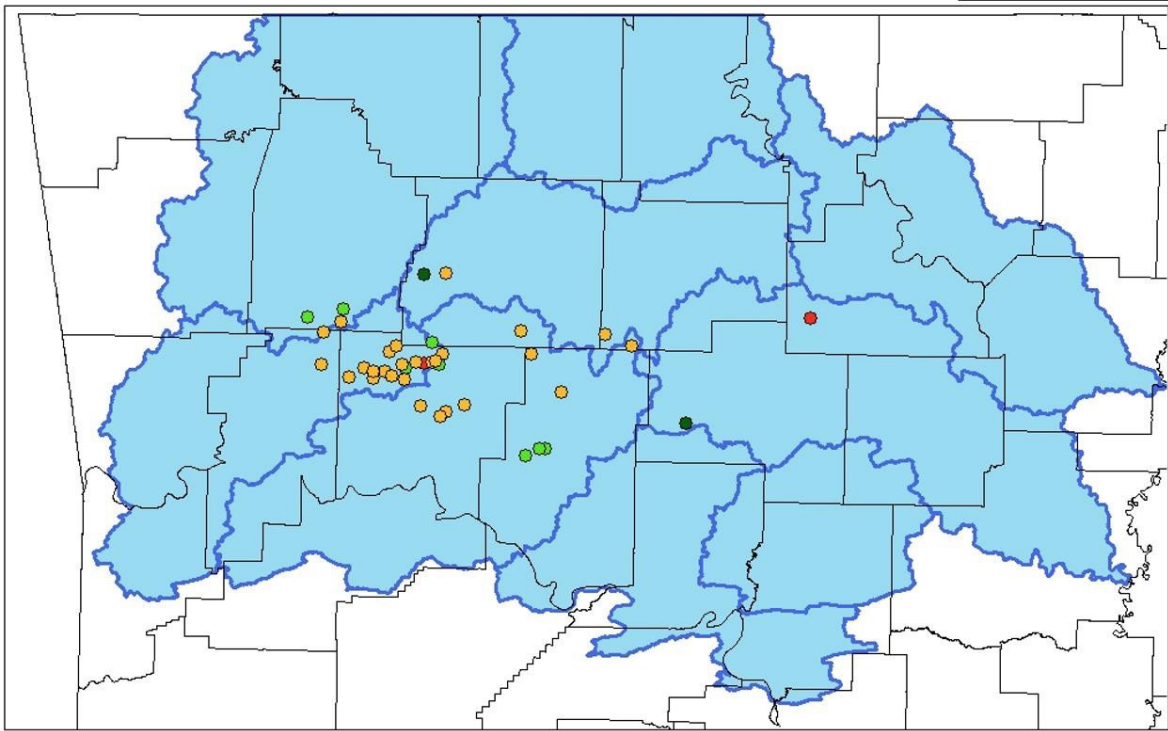

Supplement: Causeyi_Supplemental_Figure_S1.pdf [file Causeyi_Supplemental_Figure_S1.pdf]
