# Supplementary material for: A multi-method approach for assessing the distribution of a rare, burrowing North American crayfish species
Source: PeerJ journal article supplement (doi:10.7717/peerj.14748), 2023-02-20

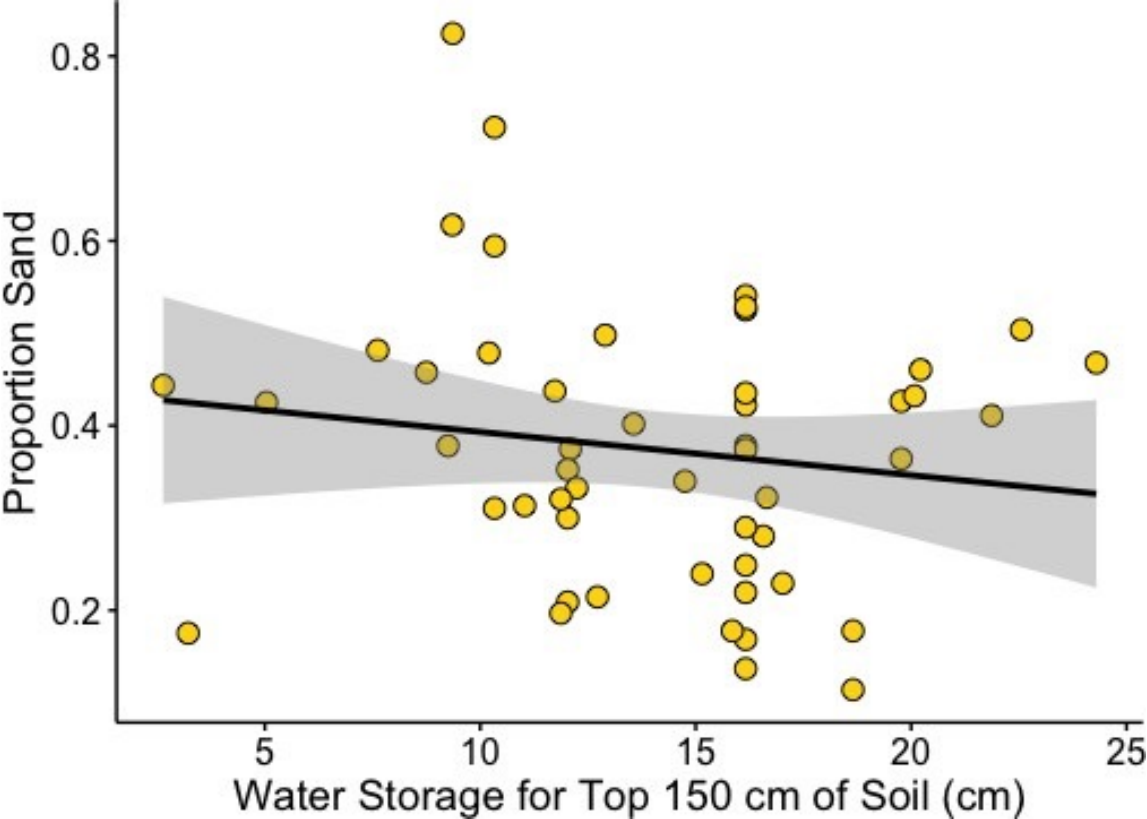

Supplement: Causeyi_Supplemental_Figure_S2.pdf [file Causeyi_Supplemental_Figure_S2.pdf]
